# Supplementary material for: Volatile profiling in Rhus coriaria fruit (sumac) from three different geographical origins and upon roasting as analyzed via solid-phase microextraction
Source: PubMed Central journal article supplement (PMC6035716; doi:10.7717/peerj.5121), 2018-07-04
Supplement: peerj-06-5121-s001.pdf [file peerj-06-5121-s001.pdf]

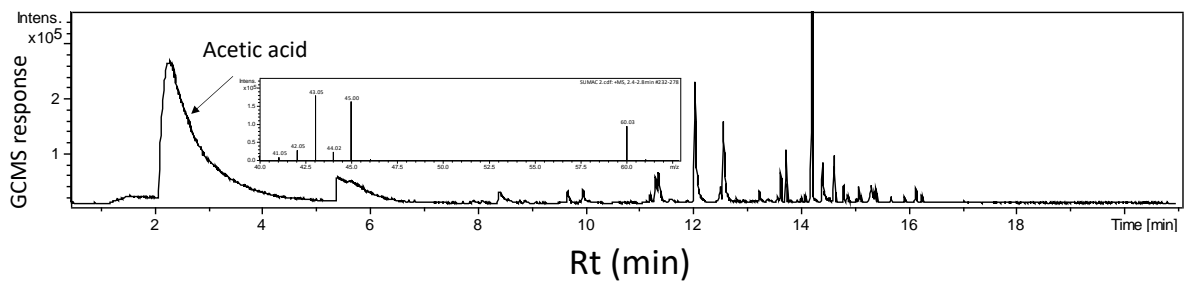

**Suppl. Fig. S1:** Representative SPME-GC-MS chromatogram of fresh *R. coriaria* fruit (Sumac) starting from 0 minutes and showing major acetic acid peak eluting at 2.3 min.

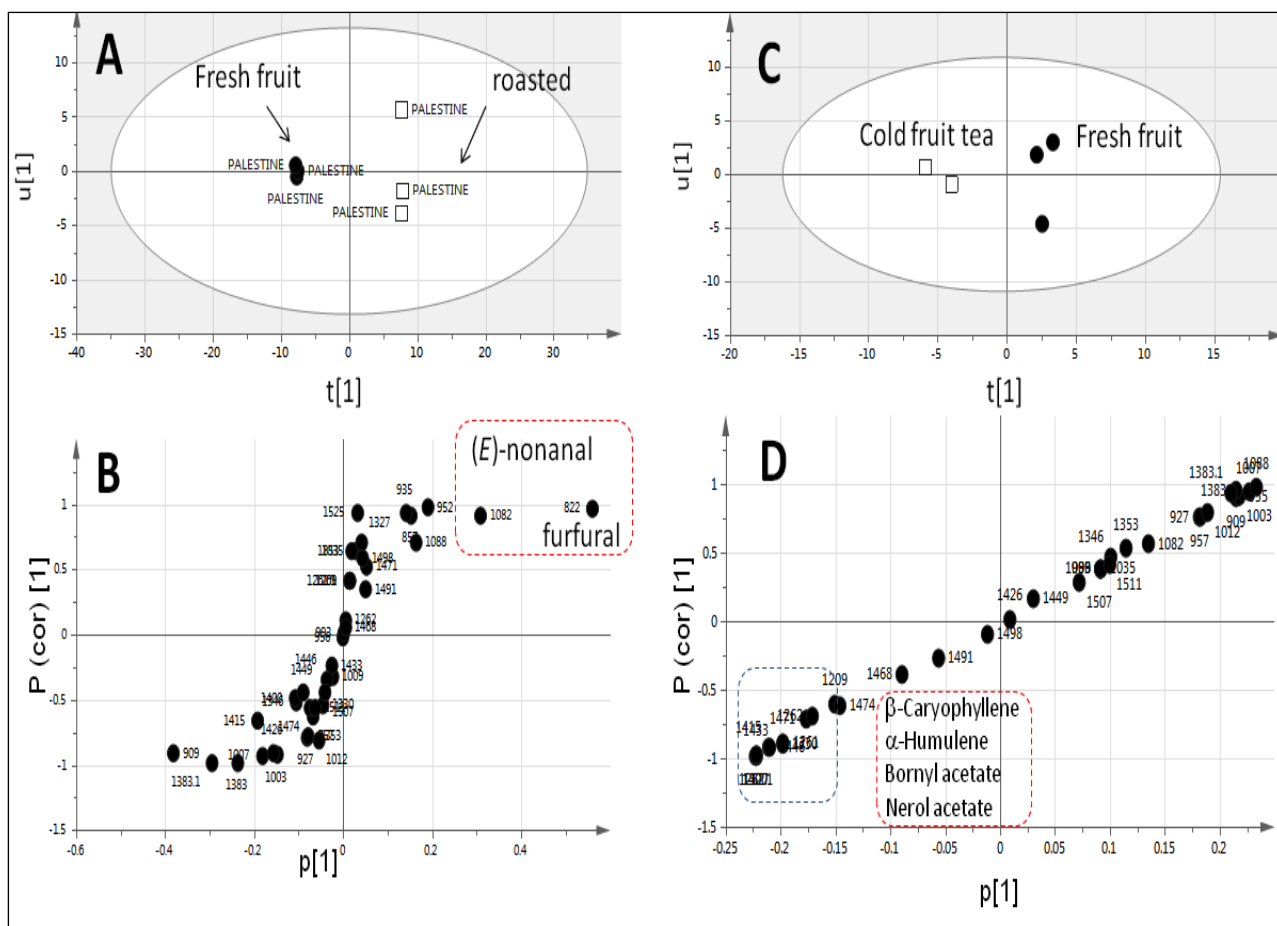

**Suppl. Fig. S2:** OPLS-DA score plots derived from modeling roasted Sumac fruit (A) and cold beverage Sumac fruit (C) separately against fresh Sumac fruit. The S-plot derived from roasted (B) and cold beverage (D) shows the covariance  $p[1]$  against the correlation  $p[1]$  of the variables of the discriminating component of the OPLS-DA model. Cut-off values of  $P < 0.05$  were used; chosen variables are highlighted in the S-plot with KI values.
